# Supplementary material for: (1-(4-(5-Phenyl-1,3,4-oxadiazol-2-yl)phenyl)-1H-1,2,3-triazol-4-yl)-methylenyls α,ω-Bisfunctionalized 3- and 4-PEG: Synthesis and Photophysical Studies
Source: MDPI journal article supplement (doi:10.3390/molecules28135256), 2023-07-06
Supplement: s1 [file s1]

# (1-(4-(5-Phenyl-1,3,4-oxadiazol-2-yl)phenyl)-1*H*-1,2,3-triazol-4-yl)-methylenyls $\alpha,\omega$ -Bisfunctionalized 3- and 4-PEG: Synthesis and Photophysical Studies

Mohammed S. Mohammed <sup>1</sup>, Igor S. Kovalev <sup>1</sup>, Natalya V. Slovesnova <sup>1,2</sup>, Leila K. Sadieva <sup>1,\*</sup>, Vadim A. Platonov <sup>1</sup>, Grigory A. Kim <sup>3,4</sup>, Rammohan Aluru <sup>1</sup>, Alexander S. Novikov <sup>5,6</sup>, Olga S. Taniya <sup>1</sup> and Valery N. Charushin <sup>1,3</sup>

<sup>1</sup> Chemical Engineering Institute, Ural Federal University, 19 Mira St., 620002 Yekaterinburg, Russia; mmokhammed@urfu.ru (M.S.M.); i.s.kovalev@urfu.ru (I.S.K.); n.v.slovesnova@urfu.ru (N.V.S.); vadim.platonov@urfu.ru (V.A.P.); raluru@urfu.ru (R.A.); olga.tania@urfu.ru (O.S.T.); v.n.charushin@urfu.ru (V.N.C.)

<sup>2</sup> Department of Pharmacy and Chemistry, Ural Medical University, 3 Repina St., 620028 Yekaterinburg, Russia

<sup>3</sup> I. Ya. Postovsky Institute of Organic Synthesis of RAS (Ural Division), 22/20, S. Kovalevskoy/Akademicheskaya St., 620137 Yekaterinburg, Russia; kim-g@ios.uran.ru

<sup>4</sup> Institute of Natural Sciences and Mathematics, Ural Federal University, 19 Mira St., 620002 Yekaterinburg, Russia

<sup>5</sup> Institute of Chemistry, Saint Petersburg State University, Universitetskaya Nab., 7/9, 199034 Saint Petersburg, Russia; a.s.novikov@spbu.ru

<sup>6</sup> Research Institute of Chemistry, Peoples' Friendship University of Russia (RUDN University), Miklukho-Maklaya Street, 6, 117198 Moscow, Russia

\* Correspondence: l.k.sadieva@urfu.ru

## Contents

|                                                                              |    |
|------------------------------------------------------------------------------|----|
| 1. Materials and equipment.....                                              | 3  |
| 2. Experimental procedures .....                                             | 3  |
| 3. NMR spectra.....                                                          | 4  |
| 4. Optical studies.....                                                      | 5  |
| 5. Stern-Volmer calculations .....                                           | 6  |
| 6. Additional studies of mechanism of quenching .....                        | 18 |
| 7. DFT calculations .....                                                    | 22 |
| 8. Recognition of Hg <sup>2+</sup> via fluorescence “turn off” process ..... | 25 |

## 1. Materials and equipment

Unless otherwise indicated, all common reagents and solvents were used from commercial suppliers without further purification. Melting points were determined on Boetius combined heating stages. TLC and column chromatography were carried out on SiO<sub>2</sub>. <sup>1</sup>H NMR and <sup>13</sup>C NMR spectra were recorded at room temperature at 400 and 100 MHz respectively, on a Bruker DRX-400 spectrometer (Bruker BioSpin GmbH, Rheinstetten, Germany) using CDCl<sub>3</sub> as the solvent. Peaks were labeled as singlet (s), doublet (d), triplet (t), doublet of doublets (dd), doublet of doublets of doublets (ddd) and multiplet (m). The mass spectra (electron impact) were measured on a Shimadzu GCMS-QP2010 Ultra (Shimadzu, Kyoto, Japan) instrument ionization. Elemental analyses were performed on a PerkinElmer 2400 Series II CHN-analyzer (PerkinElmer, Waltham, USA). UV-Vis absorption spectra were recorded on the Shimadzu UV-1800 spectrophotometer (Shimadzu, Kyoto, Japan), and emission spectra were measured on the Horiba FluoroMax-4 (HORIBA Jobin Yvon S.A.S., Longjumeau, France) by using quartz cells with 1 cm path length at room temperature. Absolute quantum yields of luminescence of target compounds in solution were measured by using the Integrating Sphere Quanta-φ of the Horiba-Fluoromax-4 (HORIBA Jobin Yvon S.A.S., Longjumeau, France) at room temperature. The fluorometric titration was performed by the single-point methodology using Horiba FluoroMax-4 (HORIBA Jobin Yvon S.A.S., Longjumeau, France).

## 2. Experimental procedures

In 50 mL ace flask were successively added corresponding 2- (4-azidophenyl) -5-aryl-1,3,4-oxadiazole (2.20 eqv.), copper(I) iodide (0.20 eqv.), ethynyl compound (1 eqv.) were added to 5 mL of in THF:H<sub>2</sub>O [90:10 (vol.%)]. RM heated for 10 h at 65 °C in an argon atmosphere. After the reaction was completed (TLC monitoring), the reaction mass was diluted by aqueous 10% NH<sub>4</sub>OH (10 mL). The resulting suspension was filtered. Cake dried on air. Product was purified by flash chromatography if needed.

**1,12-bis(1-(4-(5-phenyl-1,3,4-oxadiazol-2-yl)phenyl)-1H-1,2,3-triazol-4-yl)-2,5,8,11-tetraoxadodecane (3a).** Yield 103 mg, 30%. <sup>1</sup>H NMR in CDCl<sub>3</sub>, ppm: 3.71 (s, 4H, 2×CH<sub>2</sub>O), 3.73- 3.76 (m, 4H, 2×CH<sub>2</sub>O), 3.77- 3.81 (m, 4H, 2×CH<sub>2</sub>O), 4.82 (s, 4H, 2×CH<sub>2</sub>), 7.54–7.59 (m, 6H, C<sub>6</sub>H<sub>5</sub>), 7.96 (m, 4H, C<sub>6</sub>H<sub>4</sub>), 8.15 (m, 4H, C<sub>6</sub>H<sub>5</sub>), 8.21 (s, 2H, C<sub>2</sub>N<sub>3</sub>H), 8.28 (m, 4H, C<sub>6</sub>H<sub>4</sub>). <sup>13</sup>C NMR in DMSO-*d*<sub>6</sub>, ppm: 63.2 (1C), 69.0 (1C), 69.6 (1C), 70 (1C), 120.3 (1C), 122 (1C), 123 (1C), 123.1 (1C), 126.6 (1C), 128.1 (1C), 129.2 (1C), 132 (1C), 138.5 (1C), 145.4 (1C), 163 (1C), 164 (1C). EI-MS, m/z (I, %): 753 (1). Fnd, %: C 63.73, H 4.95, N 18.54; calc. for C<sub>40</sub>H<sub>36</sub>N<sub>10</sub>O<sub>6</sub>, %: C 63.82, H 4.82, N, 18.61.

**1,15-bis(1-(4-(5-phenyl-1,3,4-oxadiazol-2-yl)phenyl)-1H-1,2,3-triazol-4-yl)-2,5,8,11,14-pentaoxapentadecane (3b).** Yield 311 mg, 75%. <sup>1</sup>H NMR in CDCl<sub>3</sub>, ppm: 3.69 (s, 8H, 4×CH<sub>2</sub>O), 3.70- 3.73 (m, 4H, 2×CH<sub>2</sub>O), 3.75- 3.79 (m, 4H, 2×CH<sub>2</sub>O), 4.80 (s, 4H, 2×CH<sub>2</sub>), 7.54–7.59 (m, 6H, C<sub>6</sub>H<sub>5</sub>), 7.97 (m, 4H, C<sub>6</sub>H<sub>4</sub>), 8.13- 8.18 (m, 4H, C<sub>6</sub>H<sub>5</sub>), 8.23 (s, 2H, C<sub>2</sub>N<sub>3</sub>H), 8.29 (m, 4H, C<sub>6</sub>H<sub>4</sub>). <sup>13</sup>C NMR in DMSO-*d*<sub>6</sub>, ppm: 64 (1C), 70 (1C), 70.2 (1C), 70.3 (1C), 121 (1C), 122.6 (1C), 123.6 (1C), 124 (1C), 127.2 (1C), 129 (1C), 130 (1C), 132.5 (1C), 139.3 (1C), 146 (1C), 164 (1C), 165 (1C). EI-MS, m/z (I, %): [M-C<sub>17</sub>H<sub>12</sub>N<sub>5</sub>O<sub>2</sub>]<sup>+</sup> = 318 (6). Fnd, %: C 63.24, H 5.10, N 17.69; calc. for C<sub>42</sub>H<sub>40</sub>N<sub>10</sub>O<sub>7</sub>, %: C 63.31, H 5.06, N 17.58.

### 3. NMR spectra

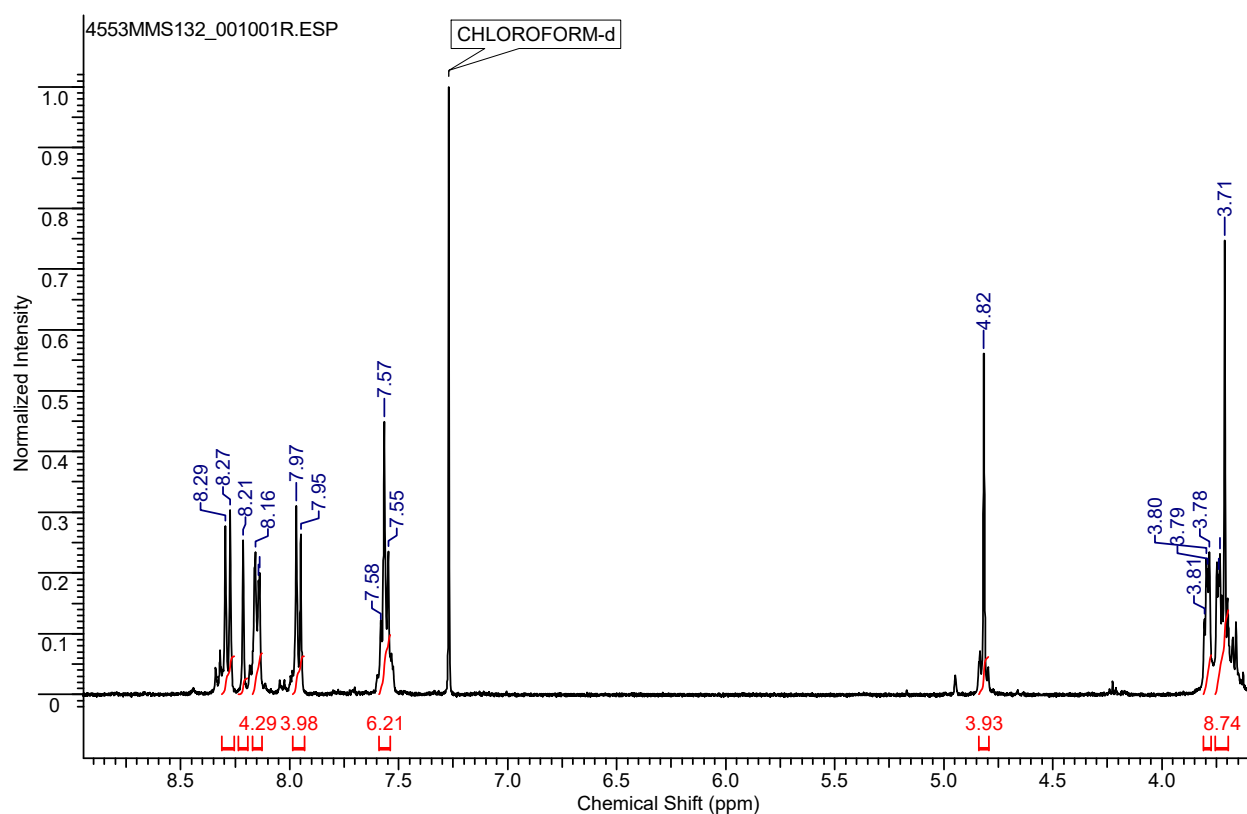

Figure S1.  $^1\text{H}$  NMR (400 MHz,  $\text{CDCl}_3$ ) of **3a**.

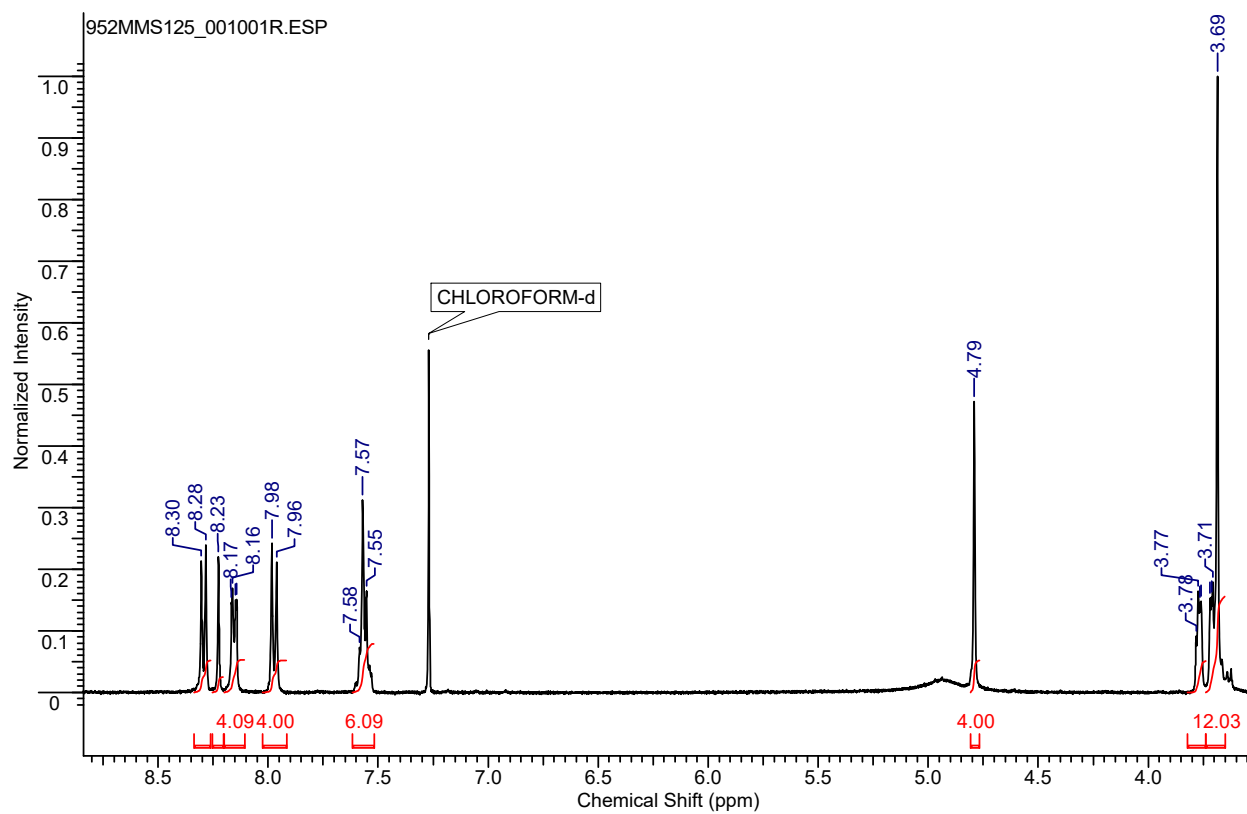

Figure S2.  $^1\text{H}$  NMR (400 MHz,  $\text{CDCl}_3$ ) of **3b**.

#### 4. Optical Studies

**Table S1.** Lifetime measurement of probes **3a,b** in THF at r.t. ( $C = 2 \times 10^{-6}$  M).

| Entry | Compound | $\tau_1$ , ns <sup>a</sup> | $\alpha_1$ <sup>b</sup> | $\tau_2$ , ns <sup>a</sup> | $\alpha_2$ <sup>b</sup> | $\tau_{av}$ , ns <sup>a</sup> | $\chi^2$ <sup>d</sup> |
|-------|----------|----------------------------|-------------------------|----------------------------|-------------------------|-------------------------------|-----------------------|
| 1     | 3a       | 0.94                       | 0.84                    | 1.80                       | 0.16                    | 3.4                           | 1.11                  |
| 2     | 3b       | 0.69                       | 0.28                    | 1.52                       | 0.72                    | 2.6                           | 1.10                  |

<sup>a</sup> Decay time, <sup>b</sup> Fractional contribution, <sup>c</sup> Weighted average decay time  $\tau_{av} = \sum (\tau_i \times \alpha_i)$ , <sup>d</sup> Quality of fitting.

**Table S2.** Data of wavelength of absorption/emission and Stokes shift in different solutions.

| 3a   | $\lambda_{abs\ max}$ , nm | $\lambda_{em\ max}$ , nm | Stokes shift, nm | 3b   | $\lambda_{abs\ max}$ , nm | $\lambda_{em\ max}$ , nm | Stokes shift, nm |
|------|---------------------------|--------------------------|------------------|------|---------------------------|--------------------------|------------------|
| DMSO | 301                       | 337                      | 65               | DMSO | 304                       | 337                      | 62               |
|      |                           | 354                      |                  |      |                           | 354                      |                  |
|      |                           | 366                      |                  |      |                           | 366                      |                  |
| MeCN | 296                       | 333                      | 69               | MeCN | 296                       | 332                      | 75               |
|      |                           | 349                      |                  |      |                           | 349                      |                  |
|      |                           | 365                      |                  |      |                           | 369                      |                  |
| DCM  | 298                       | 335                      | 66               | DCM  | 299                       | 332                      | 69               |
|      |                           | 351                      |                  |      |                           | 349                      |                  |
|      |                           | 364                      |                  |      |                           | 368                      |                  |
| MeOH | 296                       | 334                      | 68               | MeOH | 296                       | 335                      | 68               |
|      |                           | 351                      |                  |      |                           | 350                      |                  |
|      |                           | 364                      |                  |      |                           | 364                      |                  |
| THF  | 299                       | 335                      | 65               | THF  | 300                       | 335                      | 64               |
|      |                           | 350                      |                  |      |                           | 350                      |                  |
|      |                           | 364                      |                  |      |                           | 364                      |                  |

#### 5. Stern-Volmer Calculations

The Stern-Volmer quenching model show the dependence of the change in the emission intensity on the analyte concentration is determined.

$$I_0/I = 1 + K_{sv} [Q] \quad (1)$$

The coupling constant for the Stern-Volmer equation was calculated as the tangent of the slope of the dependence plot  $((I_0/I)-1)$  on the concentration of the quencher ( $[Q]$ ). The analyte concentration  $[Q]$  was recalculated using the formula:  $[Q] = (C_q \times V_q)/(V_q + 3E-3)$ .

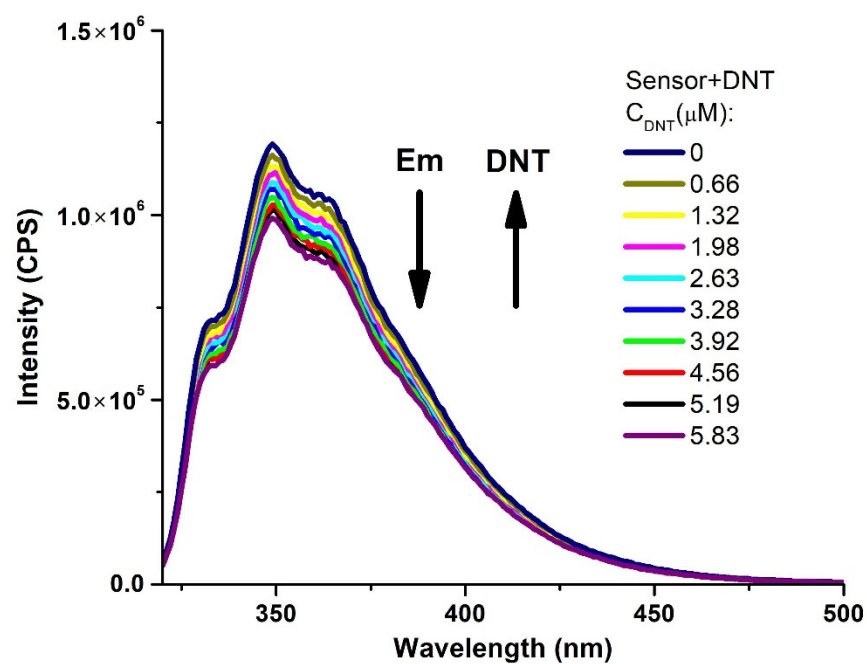

**Figure S3.** Overlaid emission spectra for compound **3a** in the presence of DNT. Sample preparation:  $C(3a) = 1 \times 10^{-6} \text{ M}$ ,  $\lambda_{\text{ex}} = 300 \text{ nm}$ .

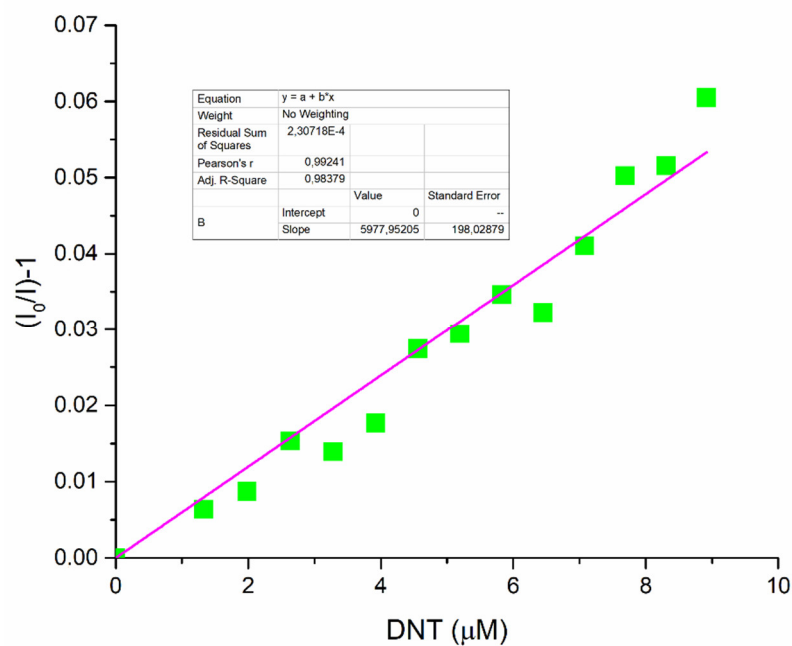

**Figure S4.** Stern-Volmer plot for compound **3a** in the presence of DNT. Sample preparation:  $C(3a) = 1 \times 10^{-6} \text{ M}$ ,  $\lambda_{\text{em}} = 350 \text{ nm}$ .

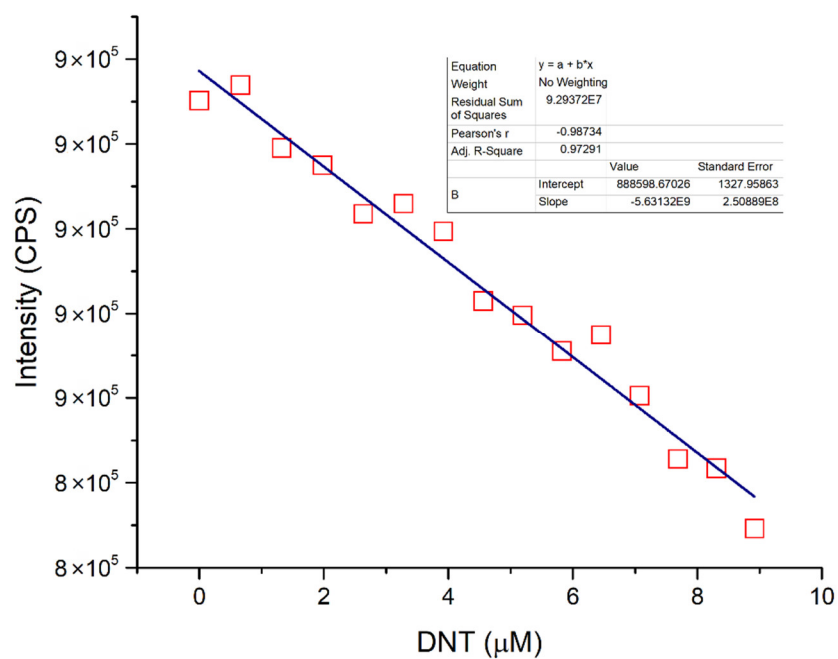

**Figure S5.** Limit of detection (LOD) plot for compound **3a** in the presence of DNT. Sample preparation:  $C(3a) = 1 \times 10^{-6}$  M,  $\lambda_{em} = 350$  nm.

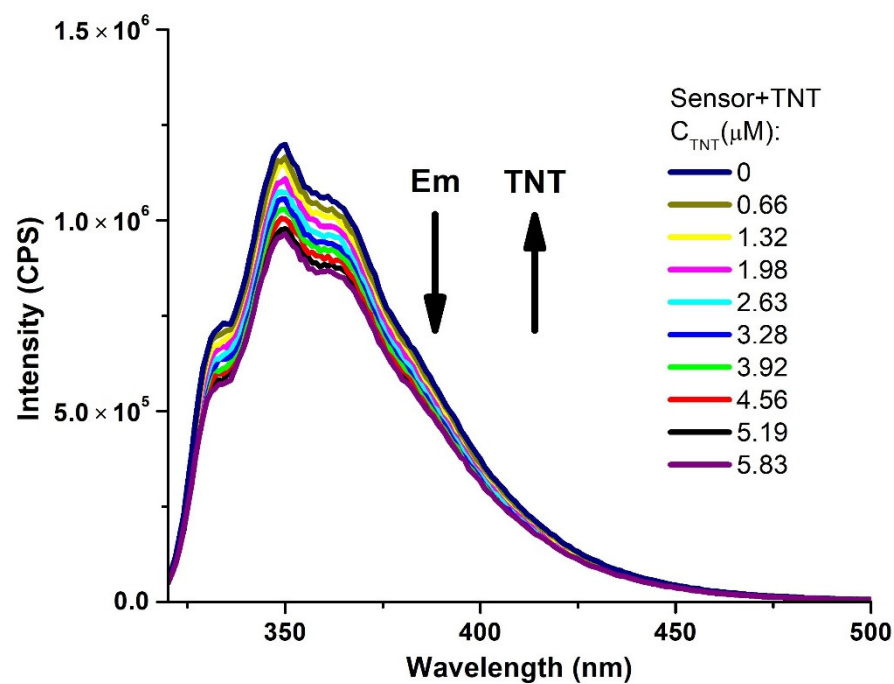

**Figure S6.** Overlaid emission spectra for compound **3a** in the presence of TNT. Sample preparation:  $C(3a) = 1 \times 10^{-6}$  M,  $\lambda_{ex} = 300$  nm.

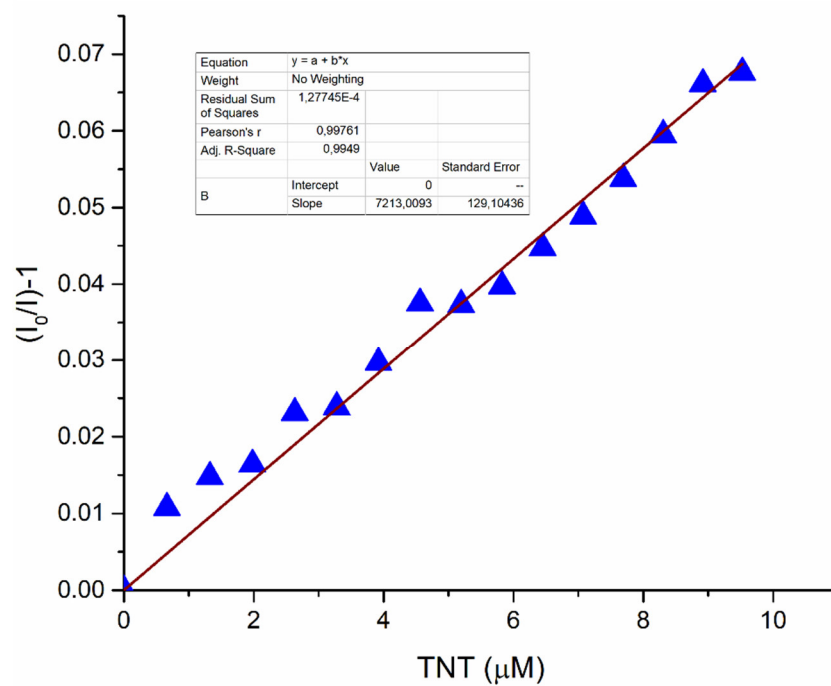

**Figure S7.** Stern-Volmer plot for compound **3a** in the presence of TNT. Sample preparation: C(**3a**) =  $1 \times 10^{-6}$  M,  $\lambda_{em}$  = 350 nm.

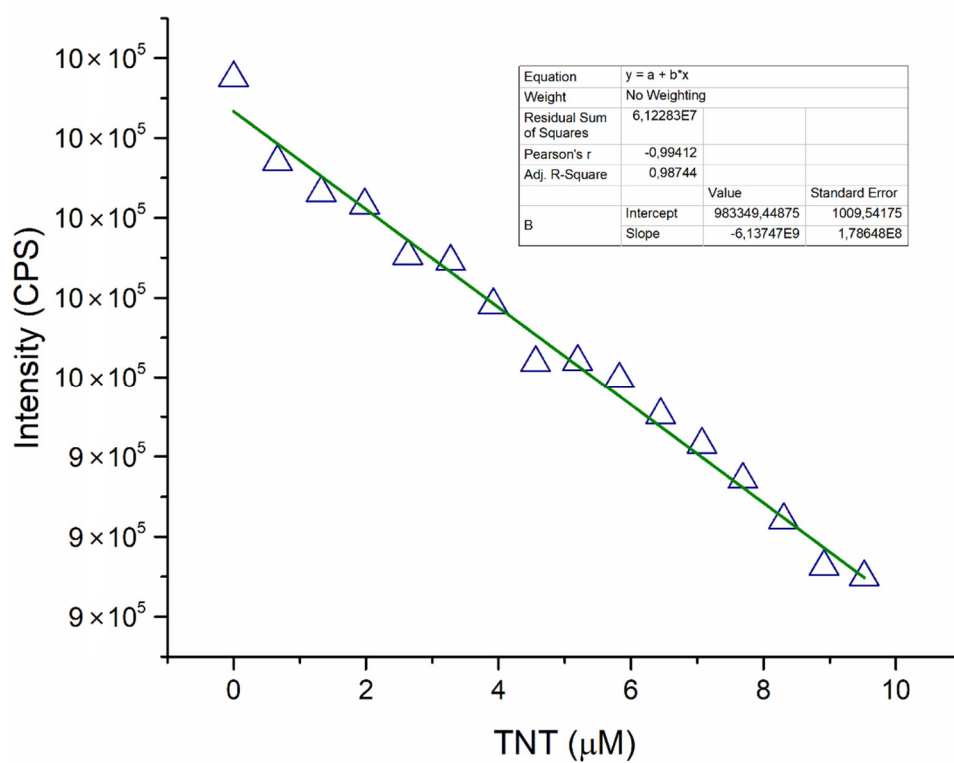

**Figure S8.** Limit of detection (LOD) plot for compound **3a** in the presence of TNT. Sample preparation: C(**3a**) =  $1 \times 10^{-6}$  M,  $\lambda_{em}$  = 350 nm.

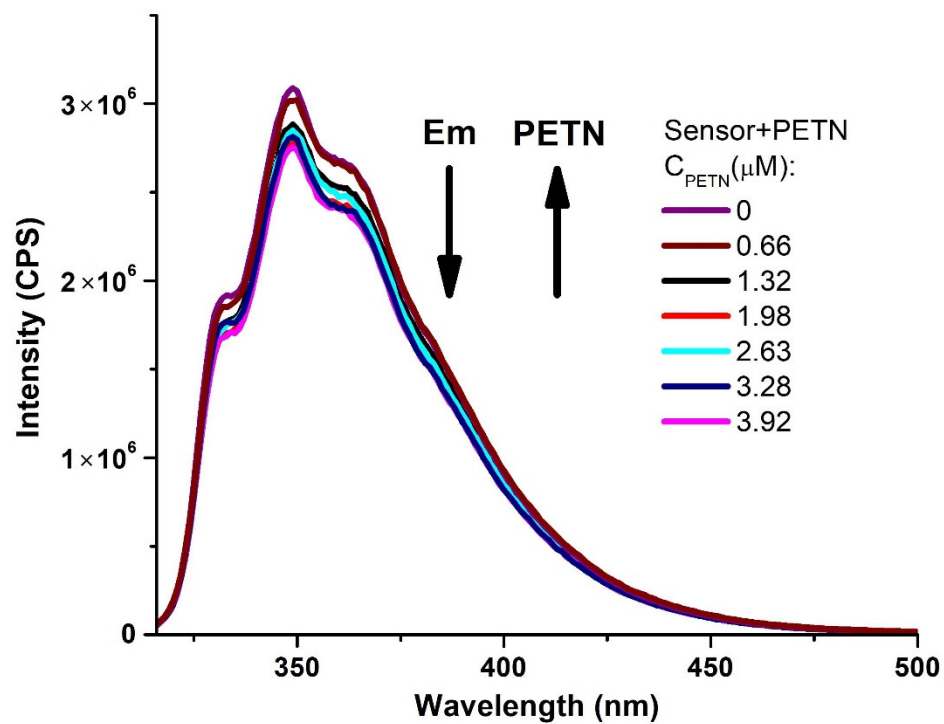

**Figure S9.** Overlayed emission spectra for compound **3a** in the presence of PETN. Sample preparation:  $C(3a) = 1 \times 10^{-6}$  M,  $\lambda_{ex} = 300$  nm.

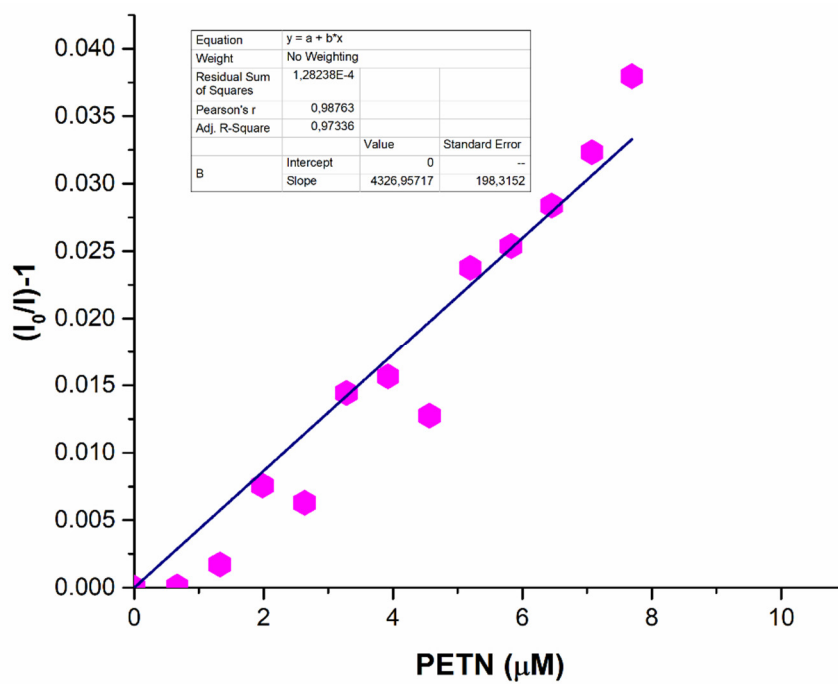

**Figure S10.** Stern-Volmer plot for compound **3a** in the presence of PETN. Sample preparation:  $C(3a) = 1 \times 10^{-6}$  M,  $\lambda_{em} = 350$  nm.



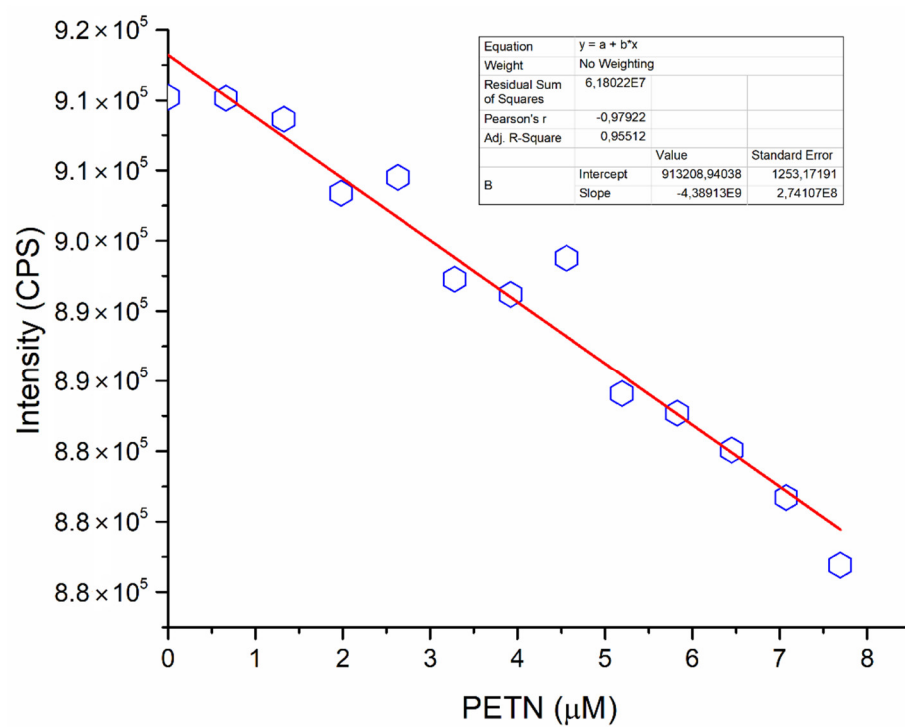

**Figure S11.** Limit of detection (LOD) plot for compound **3a** in the presence of PETN. Sample preparation:  $C(3a) = 1 \times 10^{-6}$  M,  $\lambda_{em} = 350$  nm.

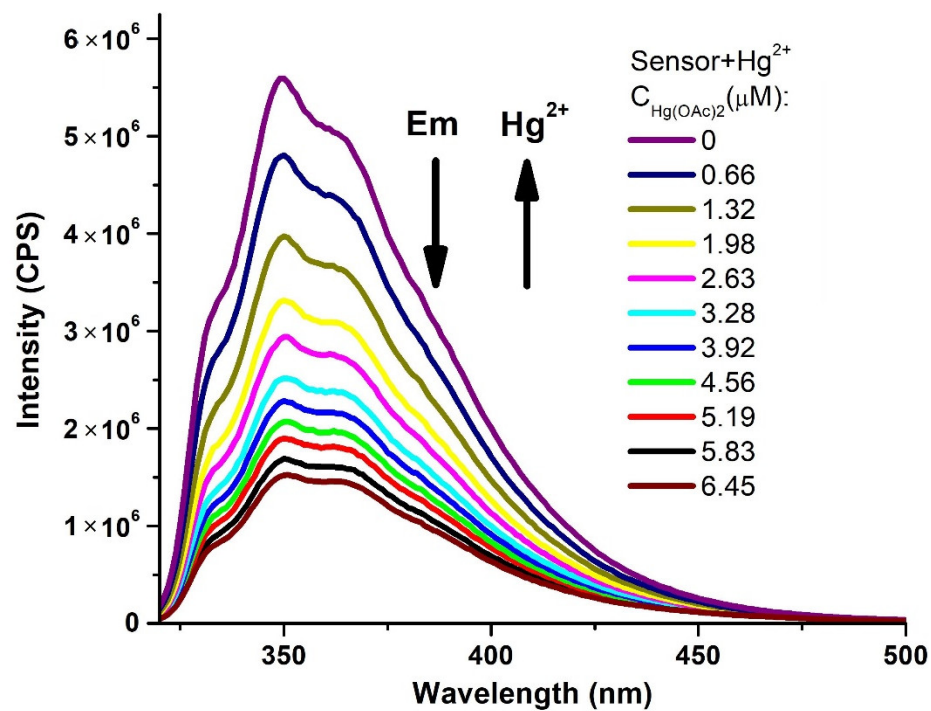

**Figure S12.** Overlaid emission spectra for compound **3a** in the presence of Hg<sup>2+</sup>. Sample preparation:  $C(3a) = 1 \times 10^{-6}$  M,  $\lambda_{ex} = 300$  nm.

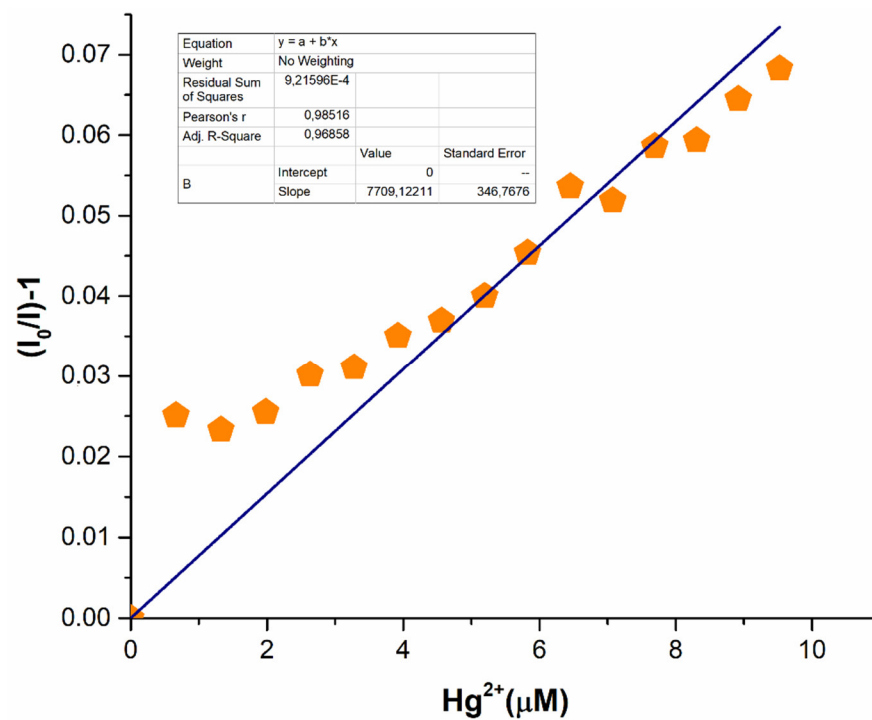

**Figure S13.** Stern-Volmer plot for compound **3a** in the presence of  $\text{Hg}^{2+}$ . Sample preparation:  $C(3a) = 1 \times 10^{-6} \text{ M}$ ,  $\lambda_{\text{em}} = 350 \text{ nm}$ .

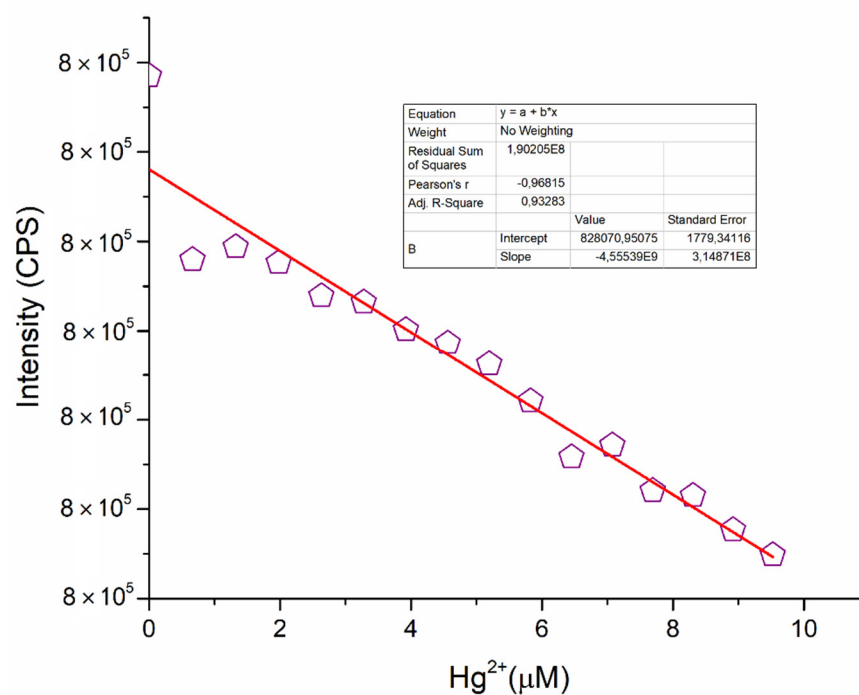

**Figure S14.** Limit of detection (LOD) plot for compound **3a** in the presence of  $\text{Hg}^{2+}$ . Sample preparation:  $C(3a) = 1 \times 10^{-6} \text{ M}$ ,  $\lambda_{\text{em}} = 350 \text{ nm}$ .

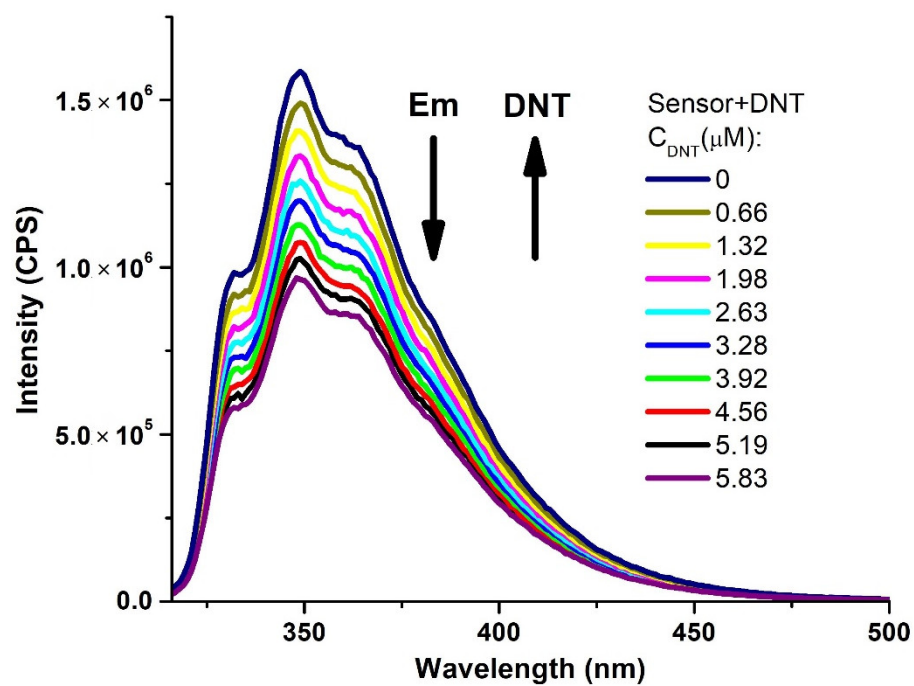

**Figure S15.** Overlaid emission spectra for compound **3b** in the presence of DNT. Sample preparation:  $C(3b) = 1 \times 10^{-6} \text{ M}$ ,  $\lambda_{\text{ex}} = 296 \text{ nm}$ .

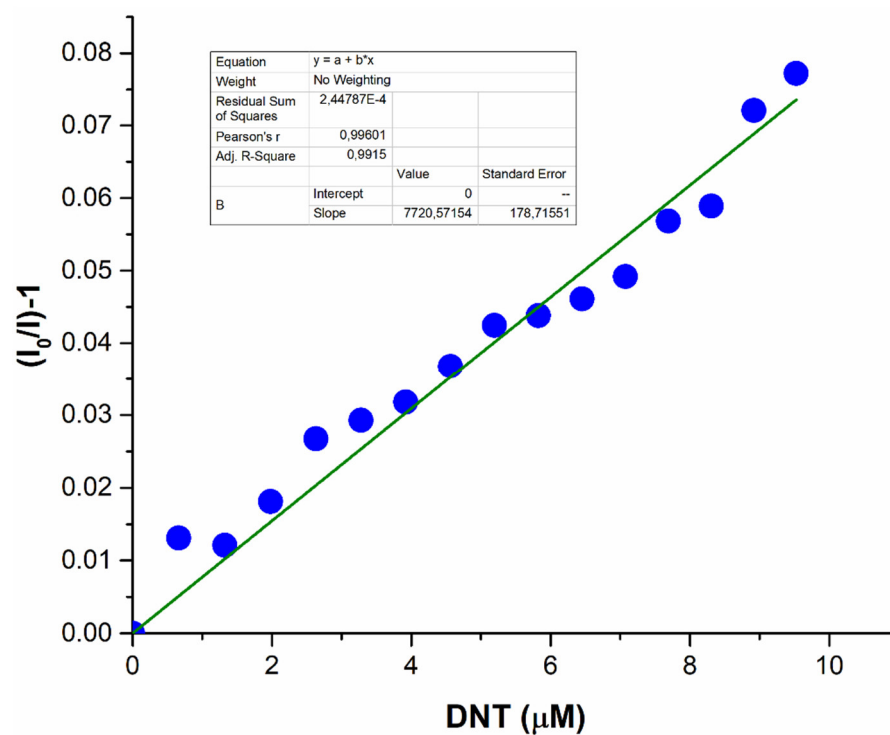

**Figure S16.** Stern-Volmer plot for compound **3b** in the presence of DNT. Sample preparation:  $C(3b) = 1 \times 10^{-6} \text{ M}$ ,  $\lambda_{\text{em}} = 350 \text{ nm}$ .

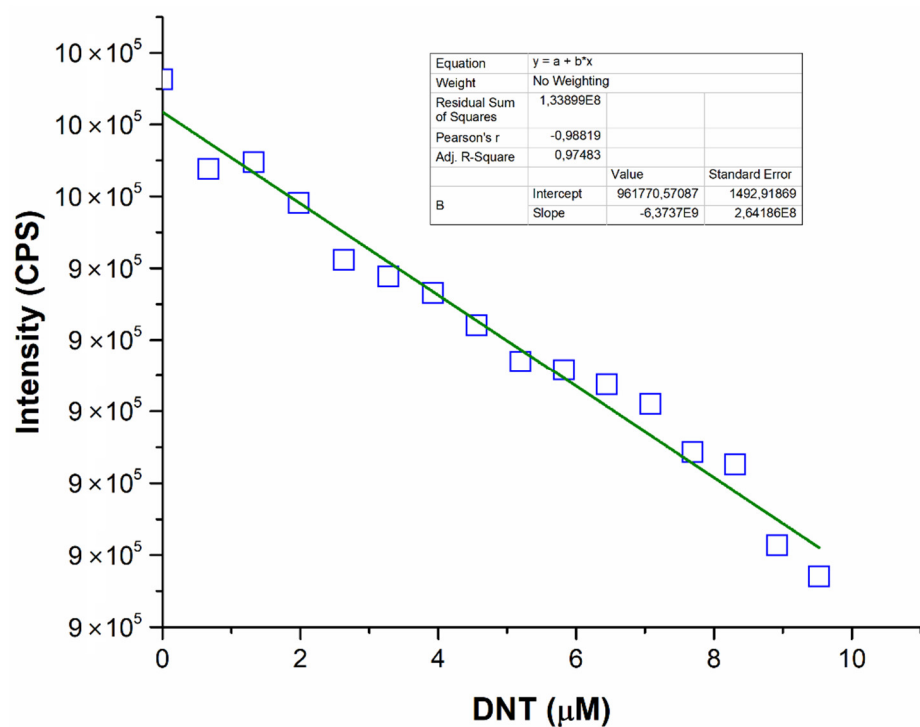

**Figure S17.** Limit of detection (LOD) plot for compound **3b** in the presence of DNT. Sample preparation:  $C(3b) = 1 \times 10^{-6}$  M,  $\lambda_{em} = 350$  nm.

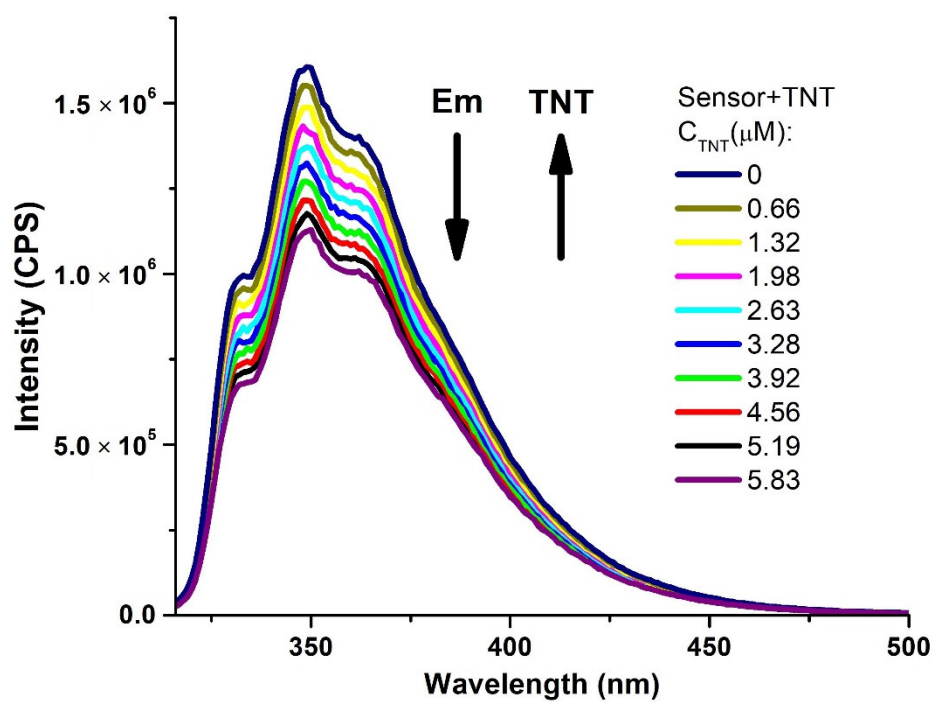

**Figure S18.** Overlaid emission spectra for compound **3b** in the presence of TNT. Sample preparation:  $C(3b) = 1 \times 10^{-6}$  M,  $\lambda_{ex} = 296$  nm.

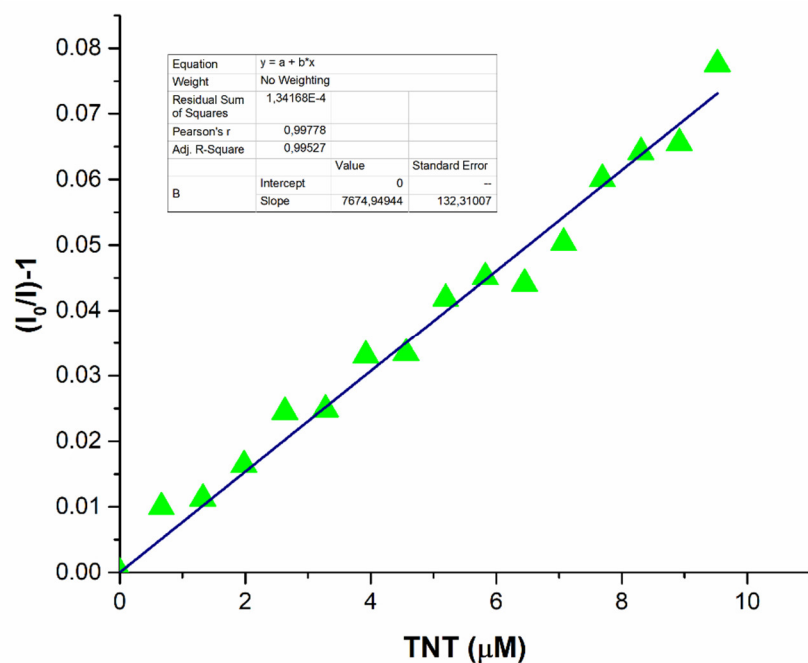

**Figure S19.** Stern-Volmer plot for compound **3b** in the presence of TNT. Sample preparation: C(**3b**) =  $1 \times 10^{-6}$  M,  $\lambda_{em} = 350$  nm.

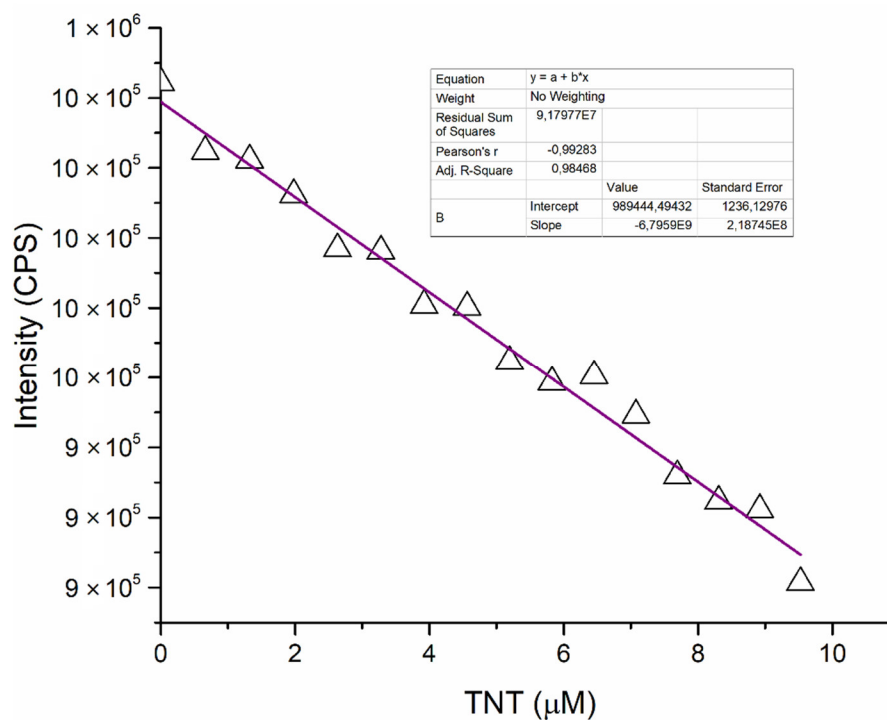

**Figure S20.** Limit of detection (LOD) plot for compound **3b** in the presence of TNT. Sample preparation: C(**3b**) =  $1 \times 10^{-6}$  M,  $\lambda_{em} = 350$  nm.

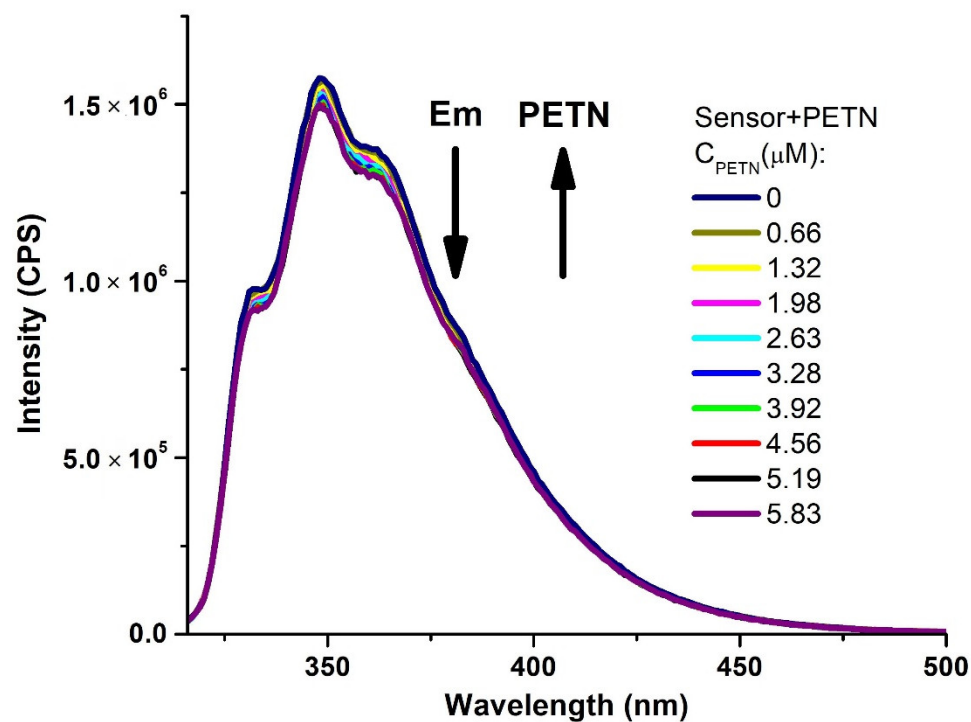

**Figure S21.** Overlaid emission spectra for compound **3b** in the presence of PETN. Sample preparation: C(**3b**) =  $1 \times 10^{-6}$  M,  $\lambda_{\text{ex}}$  = 296 nm.

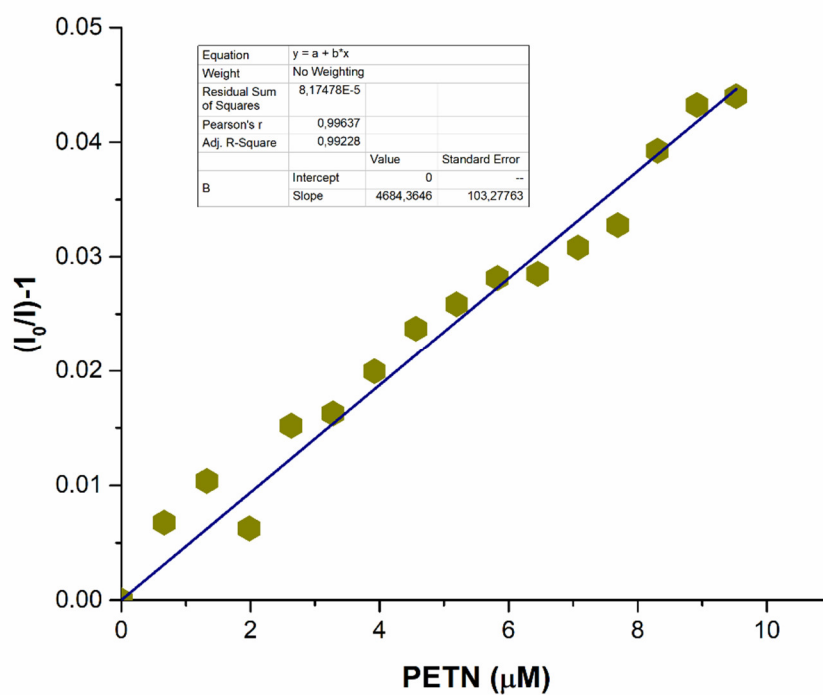

**Figure S22.** Stern-Volmer plot for compound **3b** in the presence of PETN. Sample preparation: C(**3b**) =  $1 \times 10^{-6}$  M,  $\lambda_{\text{em}}$  = 350 nm.

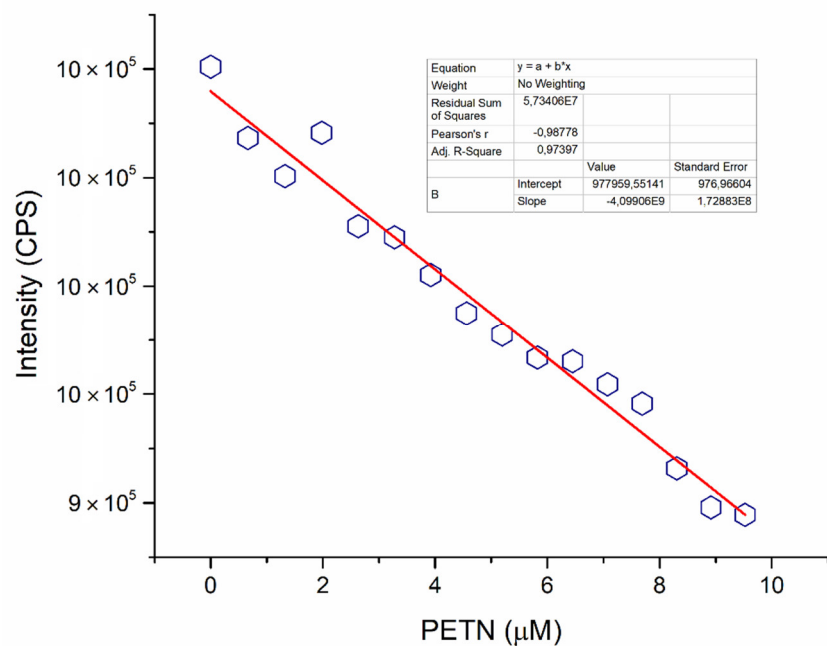

**Figure S23.** Limit of detection (LOD) plot for compound **3b** in the presence of PETN. Sample preparation:  $C(3b) = 1 \times 10^{-6}$  M,  $\lambda_{em} = 350$  nm.

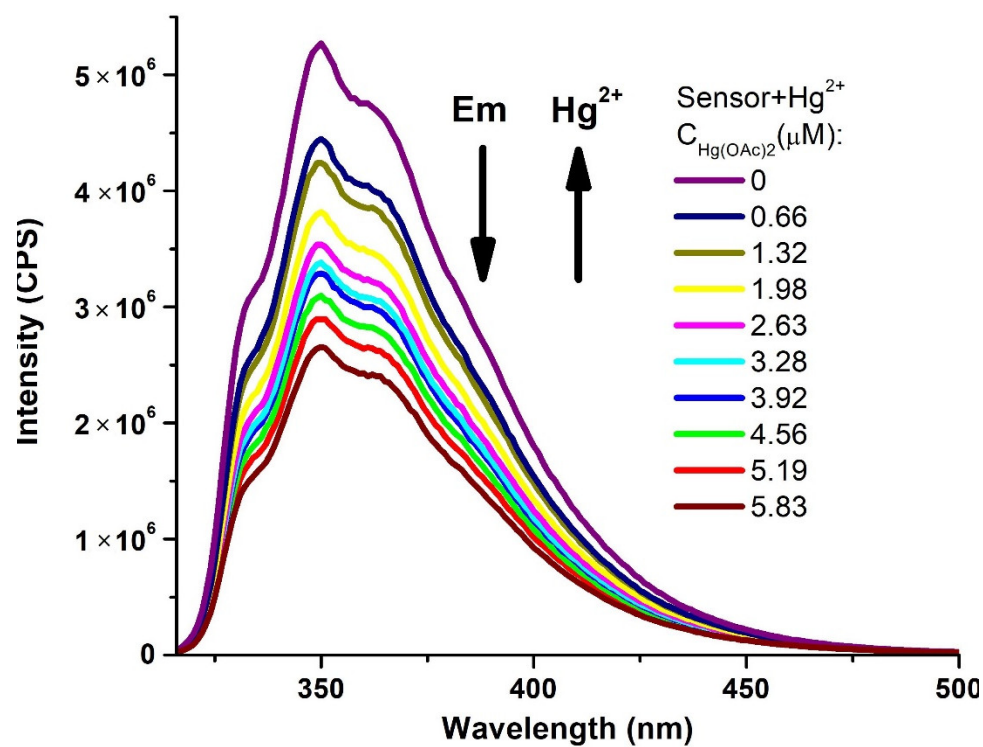

**Figure S24.** Overlaid emission spectra for compound **3b** in the presence of  $Hg^{2+}$ . Sample preparation:  $C(3b) = 1 \times 10^{-6}$  M,  $\lambda_{ex} = 296$  nm.

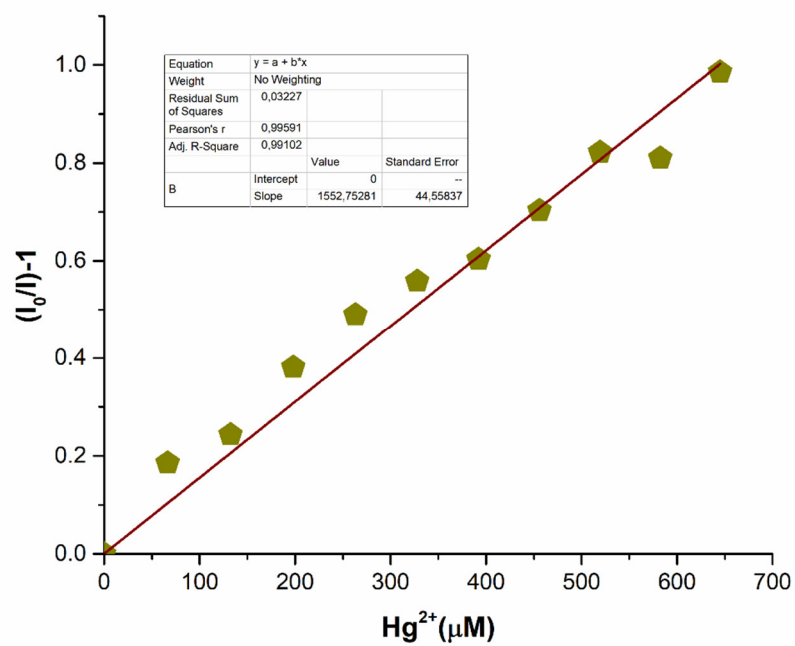

**Figure S25.** Stern-Volmer plot for compound **3b** in the presence of  $\text{Hg}^{2+}$ . Sample preparation:  $\text{C}(\mathbf{3b}) = 1 \times 10^{-6} \text{ M}$ ,  $\lambda_{\text{em}} = 350 \text{ nm}$ .

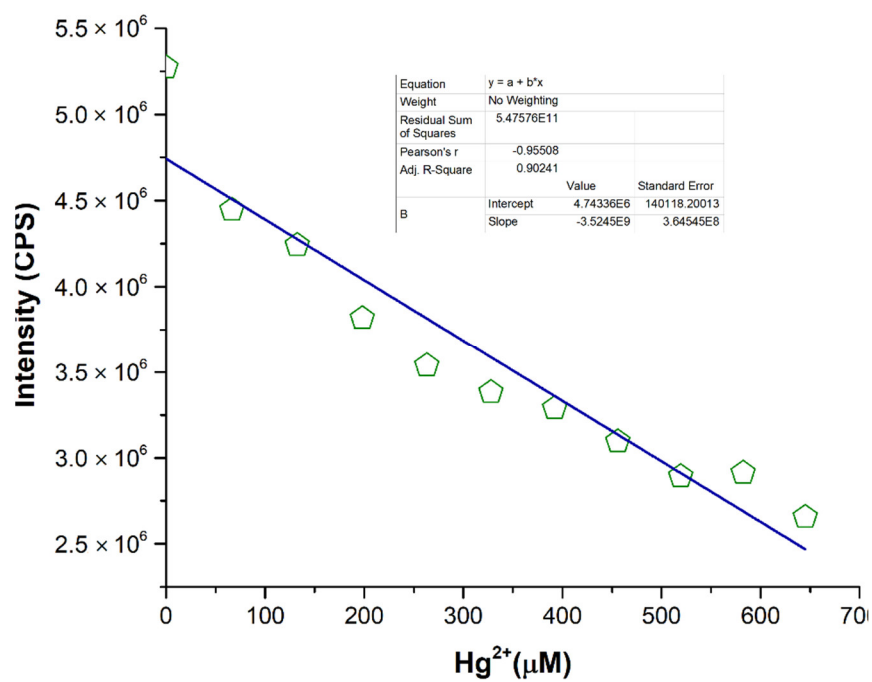

**Figure S26.** Limit of detection (LOD) plot for compound **3b** in the presence of  $\text{Hg}^{2+}$ . Sample preparation:  $\text{C}(\mathbf{3b}) = 1 \times 10^{-6} \text{ M}$ ,  $\lambda_{\text{em}} = 350 \text{ nm}$ .



## 6. Additional Studies of Mechanism of Quenching

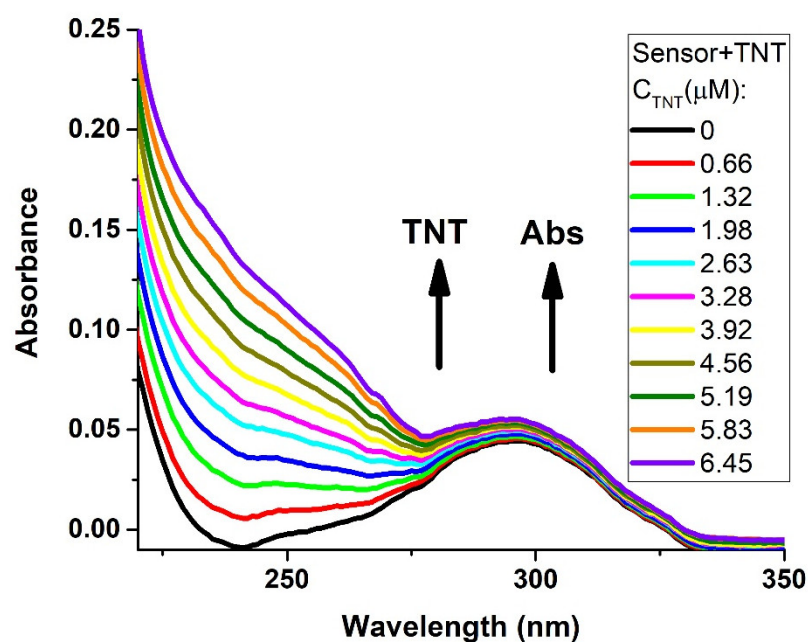

**Figure S27.** Overlaid absorption spectra for compound **3b** in the presence of TNT. Sample preparation:  $C(3b) = 1 \times 10^{-6}$  M.

**Table S3.** Lifetime measurement of probe **3b** in the presence of TNT in MeCN at r.t. ( $C = 1 \times 10^{-6}$  M).

| Entry | $C_{TNT}, \mu M$ | $\tau_1, ns^a$ | $\alpha_1^b$ | $\tau_2, ns^a$ | $\alpha_2^b$ | $\tau_{av}, ns^c$ |
|-------|------------------|----------------|--------------|----------------|--------------|-------------------|
| 1     | 0                | 0.67           | 0.56         | 1.87           | 0.44         | 1.19              |
| 2     | 0.66             | 0.68           | 0.57         | 1.87           | 0.43         | 1.19              |
| 3     | 1.32             | 0.64           | 0.53         | 1.81           | 0.47         | 1.19              |
| 4     | 1.98             | 0.67           | 0.56         | 1.86           | 0.44         | 1.19              |
| 5     | 2.63             | 0.64           | 0.54         | 1.84           | 0.46         | 1.19              |
| 6     | 3.28             | 0.67           | 0.56         | 1.86           | 0.44         | 1.19              |
| 7     | 3.92             | 0.65           | 0.54         | 1.83           | 0.46         | 1.19              |
| 8     | 4.56             | 0.65           | 0.54         | 1.83           | 0.46         | 1.19              |
| 9     | 5.19             | 0.65           | 0.54         | 1.83           | 0.46         | 1.19              |
| 10    | 5.83             | 0.67           | 0.56         | 1.87           | 0.44         | 1.19              |
| 11    | 6.45             | 0.63           | 0.52         | 1.79           | 0.48         | 1.19              |

<sup>a</sup> Decay time, <sup>b</sup> Fractional contribution, <sup>c</sup> Weighted average decay time  $\tau_{av} = \sum (\tau_i \times \alpha_i)$ .

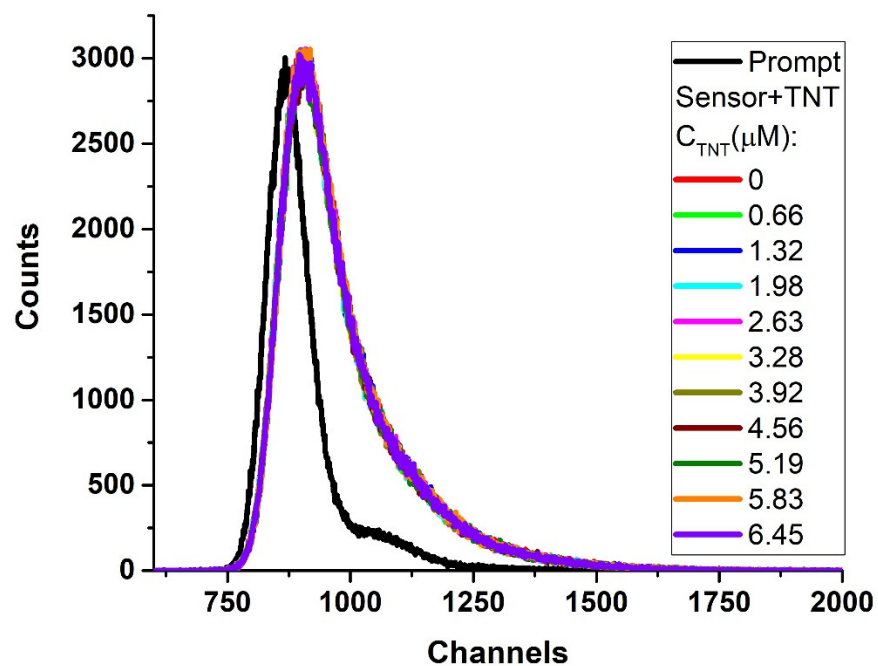

**Figure S28.** Overlaid time-resolved emission spectra for compound **3b** in the presence of TNT. Sample preparation:  $C(3b) = 1 \times 10^{-6}$  M.

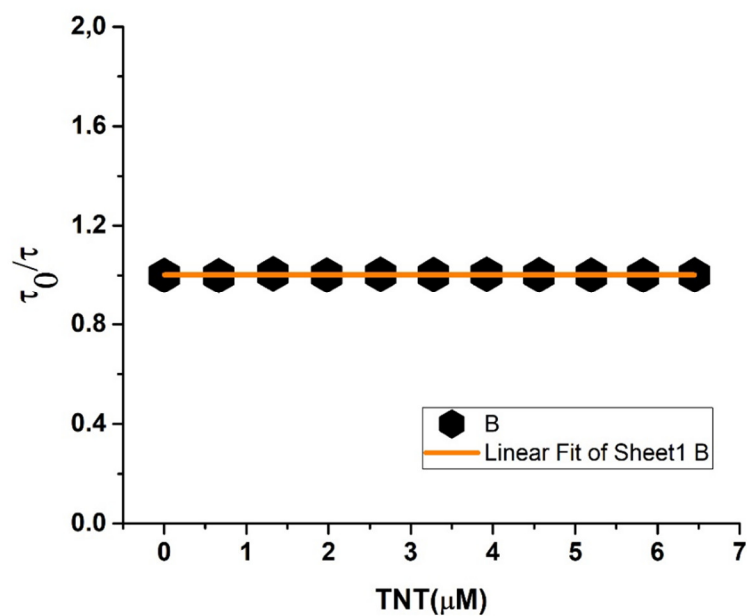

**Figure S29.** The graphical result of time-resolved fluorescence titration of **3b** by TNT monitored at 350 nm.

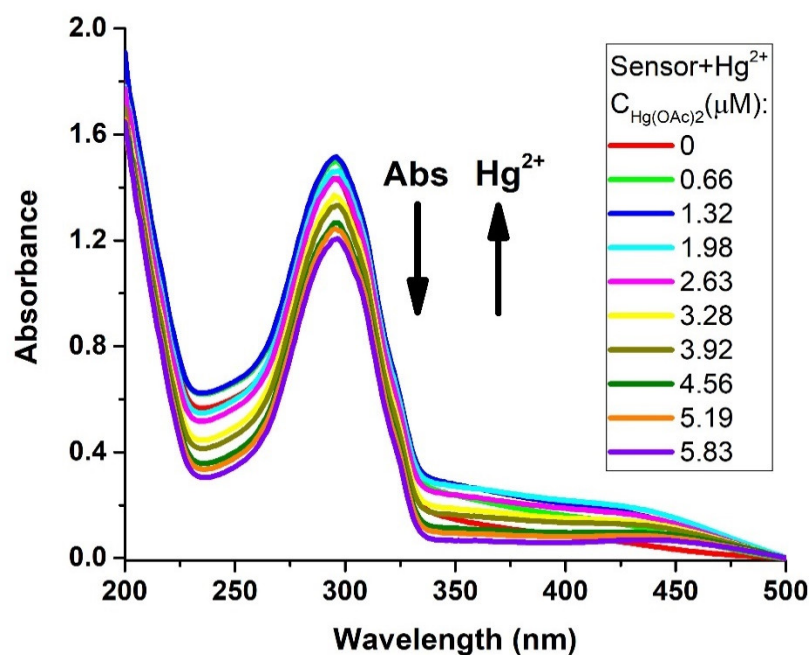

**Figure S30.** Overlaid absorption spectra for compound **3a** in the presence of  $\text{Hg}^{2+}$ . Sample preparation:  $C(\mathbf{3a}) = 1 \times 10^{-6}$  M.

**Table S4.** Lifetime measurement of probe **3a** in the presence of  $\text{Hg}^{2+}$  in MeCN:H<sub>2</sub>O [90:10 (vol.%)] at r.t. ( $C(\mathbf{3a}) = 1 \times 10^{-6}$  M).

| Entry | $C_{\text{Hg}(\text{OAc})_2}$ , $\mu\text{M}$ | $\tau_1$ , ns <sup>a</sup> | $\alpha_1^b$ | $\tau_2$ , ns <sup>a</sup> | $\alpha_2^b$ | $\tau_{\text{av}}$ , ns <sup>c</sup> |
|-------|-----------------------------------------------|----------------------------|--------------|----------------------------|--------------|--------------------------------------|
| 1     | 0                                             | 0.60                       | 0.72         | 2.36                       | 0.28         | 1.09                                 |
| 2     | 0.66                                          | 0.61                       | 0.72         | 2.39                       | 0.28         | 1.11                                 |
| 3     | 1.32                                          | 0.63                       | 0.72         | 2.43                       | 0.28         | 1.13                                 |
| 4     | 1.98                                          | 0.64                       | 0.73         | 2.51                       | 0.27         | 1.14                                 |
| 5     | 2.63                                          | 0.62                       | 0.72         | 2.44                       | 0.29         | 1.14                                 |
| 6     | 3.28                                          | 0.63                       | 0.71         | 2.44                       | 0.29         | 1.15                                 |
| 7     | 3.92                                          | 0.63                       | 0.70         | 2.44                       | 0.29         | 1.16                                 |
| 8     | 4.56                                          | 0.63                       | 0.70         | 2.43                       | 0.30         | 1.17                                 |
| 9     | 5.19                                          | 0.64                       | 0.70         | 2.42                       | 0.30         | 1.17                                 |
| 10    | 5.83                                          | 0.65                       | 0.70         | 2.43                       | 0.30         | 1.19                                 |
| 11    | 6.45                                          | 0.66                       | 0.70         | 2.48                       | 0.30         | 1.20                                 |

<sup>a</sup> Decay time, <sup>b</sup> Fractional contribution, <sup>c</sup> Weighted average decay time  $\tau_{\text{av}} = \sum (\tau_i \times \alpha_i)$ .

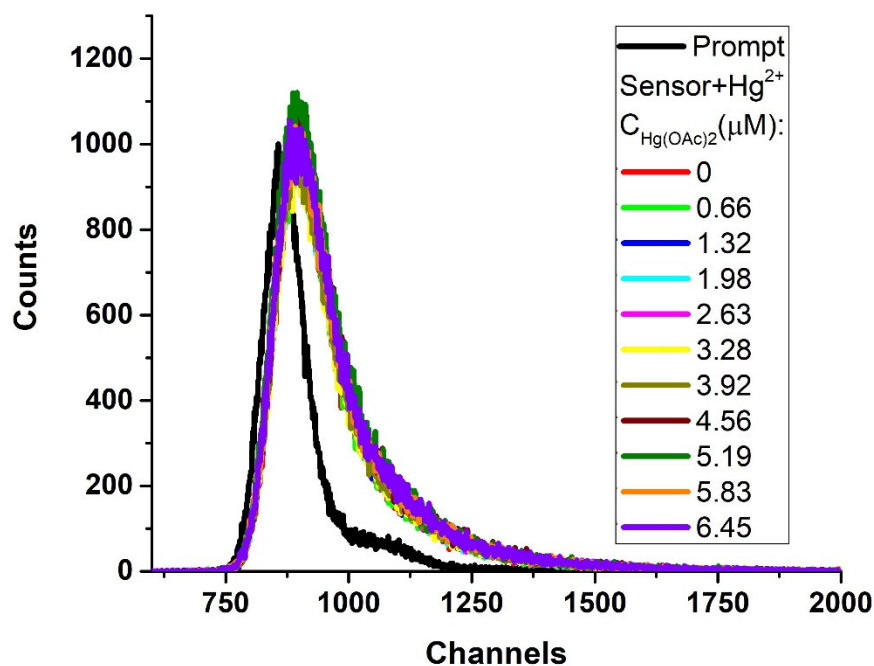

**Figure S31.** Overlaid time-resolved emission spectra for compound **3a** in the presence of  $\text{Hg}^{2+}$ . Sample preparation:  $C(\text{3a}) = 1 \times 10^{-6} \text{ M}$ .

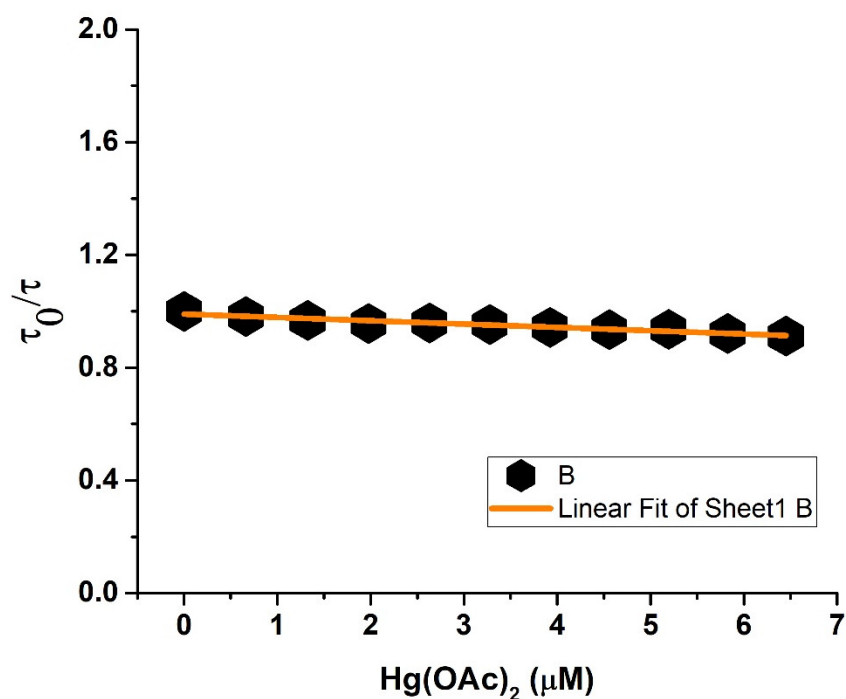

**Figure S32.** The graphical result of time-resolved fluorescence titration of **3a** by  $\text{Hg}^{2+}$  monitored at 350 nm.

## 7. DFT Calculations

The quantum chemical calculations were carried out at the CAM-B3LYP/6-31G\*//PM6 and B3LYP/631pGs level of theory with the help of the Gaussian-09 [1] program package. No symmetry restrictions were applied during the geometry optimization procedure. The solvent effects were taken into account using the SMD (Solvation Model based on Density) continuum solvation model suggested by Truhlar and coworkers [2]. The Hessian matrices were calculated for all optimized model structures to prove the location of correct minima on the potential energy surface (no imaginary frequencies were

found in all cases). The Cartesian atomic coordinates for all optimized equilibrium model structures are presented in the attached xyz-files. The hole-electron analysis was carried out in Multiwfn program (version 3.7) [3].

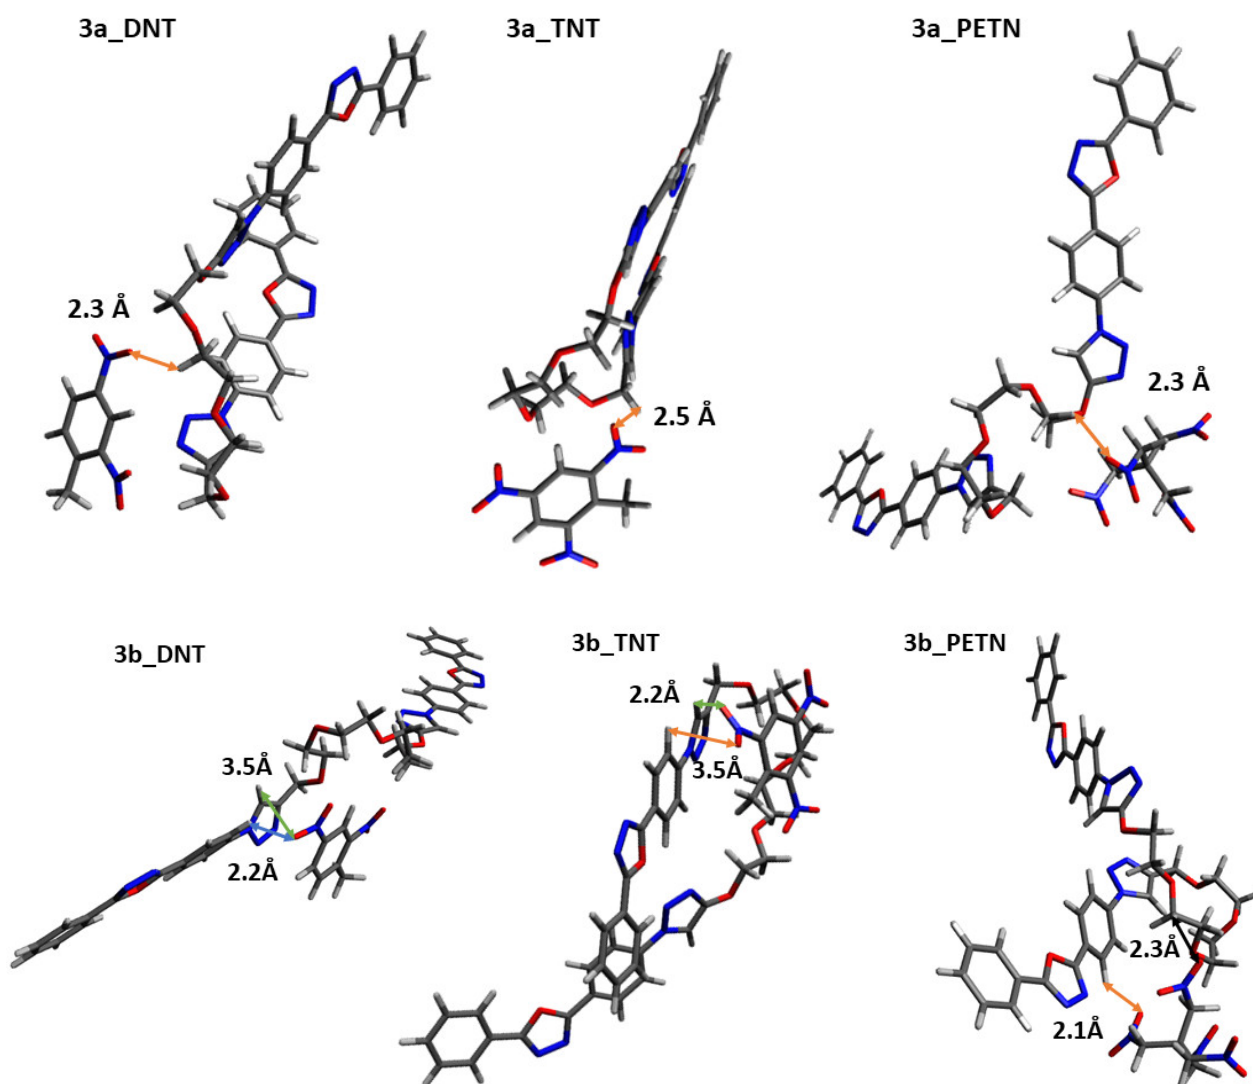

**Figure S33.** Geometric structures of the possible configurations for probes **3a,b** combining with molecular of analyte DNT/TNT/PETN (adducts): **3a\_DNT**, **3a\_TNT**, **3a\_PETN**, **3b\_DNT**, **3b\_TNT**, **3b\_PETN** on ground state.

**Table S5.** Imaging of HOMO/LUMO of **3a,b** and analytes based on B3LYP/631pGs functional in gas phase.

| Compound | HOMO                                                                                | LUMO                                                                                  |
|----------|-------------------------------------------------------------------------------------|---------------------------------------------------------------------------------------|
| 3a       | 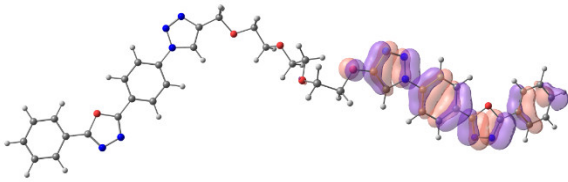   |     |
| 3b       |    |     |
| DNT      |    |    |
| TNT      |   |   |
| PETN     |  |  |

**Table S6.** The oscillator strengths for  $S_0 \rightarrow S_1$  and  $S_0 \rightarrow S_2$  transitions.

| Model structure | The oscillator strengths for $S_0 \rightarrow S_1$ and $S_0 \rightarrow S_2$ transitions |                              |
|-----------------|------------------------------------------------------------------------------------------|------------------------------|
| 3a              | $S_0 \rightarrow S_1$ 1.6187                                                             | $S_0 \rightarrow S_2$ 1.4353 |
| 3b              | $S_0 \rightarrow S_1$ 1.5808                                                             | $S_0 \rightarrow S_2$ 1.4674 |

## 8. Recognition of $\text{Hg}^{2+}$ via Fluorescence “turn off” Process

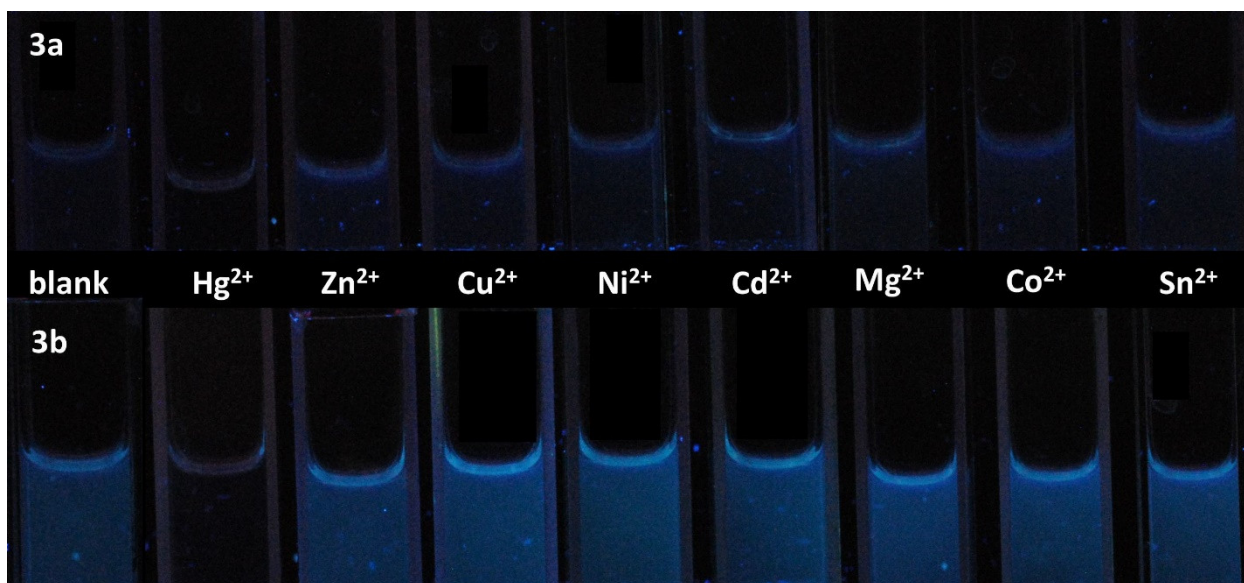

**Figure S34.** Qualitative assessment of the presence of metal ions by adding to the MeCN:H<sub>2</sub>O [90:10 (vol.%)] solution of probes **3a** (upper row) and **3b** (bottom row) ( $2 \times 10^{-4}\text{M}$ ) aqueous solution of salt ( $2 \times 10^{-2}\text{M}$ ,  $\sim 1.0$  eq.) under 365 nm UV light.

## References

1. D.J.F. M. J. Frisch, G. W. Trucks, H. B. Schlegel, G. E. Scuseria, M. A. Robb, J. R. Cheeseman, G. Scalmani, V. Barone, B. Mennucci, G. A. Petersson, H. Nakatsuji, M. Caricato, X. Li, H. P. Hratchian, A. F. Izmaylov, J. Bloino, G. Zheng, J. L. Sonnenberg, M. Had, Gaussian 09, Revision C.01, Wallingford, CT. (2010).
2. A. V. Marenich, C.J. Cramer, D.G. Truhlar, Universal solvation model based on solute electron density and on a continuum model of the solvent defined by the bulk dielectric constant and atomic surface tensions, *J. Phys. Chem. B.* 113 (2009) 6378–6396. doi:10.1021/jp810292n.
3. Lu, T.; Chen, F. Multiwfn: A Multifunctional Wavefunction Analyzer. *J. Comput. Chem.* 2012, 33, 580–592, doi:10.1002/jcc.22885.
